# Supplementary material
Source: HighWire-hosted journal article supplement (https://bmjopen.bmj.com/content/9/6/e031971)
Supplement: inline-supplementary-material-2 [file inline-supplementary-material-2.pdf]

| Outcome: Sleep problems |         |      |       |         |       |       |
|-------------------------|---------|------|-------|---------|-------|-------|
|                         | Model 1 |      |       | Model 2 |       |       |
| Variable                | B       | SE   | T     | B       | SE    | T     |
| Constant                | 1.95    | 1.84 | 1.06  | 2.38    | 1.84  | 1.39  |
| Age                     | -0.33*  | 0.01 | -2.30 | -0.34   | 0.01  | -2.59 |
| Age                     | 1.05    | 0.56 | 1.86  | 0.506   | 0.53  | 0.96  |
| BMI                     | 0.19**  | 0.05 | 1.39  | 0.135*  | 0.047 | 2.90  |
| MSK pain                |         |      |       | 3.96**  | 0.516 | 2.68  |
| R <sup>2</sup>          | 0.059   |      |       | 0.191** |       |       |
| R <sup>2</sup> Change   | 0.059   |      |       | 0.132** |       |       |

\*P < 0.05

\*\* P < 0.001

SE: Standard Error; BMI: Body mass index; MSK: musculoskeletal

| Outcome: Depressive Symptoms |         |      |       |         |      |       |         |      |       |
|------------------------------|---------|------|-------|---------|------|-------|---------|------|-------|
|                              | Model 1 |      |       | Model 2 |      |       | Model 3 |      |       |
| Variable                     | B       | SE   | T     | B       | SE   | T     | B       | SE   | T     |
| Constant                     | 2.37*   | 1.07 | 2.22  | 2.53*   | 1.03 | 2.45  | 1.90*   | 0.93 | 2.04  |
| age                          | -0.32** | 0.01 | -3.93 | -0.33** | 0.01 | -4.13 | -0.30** | 0.01 | -4.20 |
| Sex                          | 0.107   | 0.33 | 0.33  | -0.104  | 0.32 | -0.33 | -0.042  | 0.29 | -0.15 |
| BMI                          | 0.085*  | 0.03 | 2.93  | 0.065*  | 0.03 | 2.29  | 0.041   | 0.03 | 1.60  |
| MSK pain                     |         |      |       | 1.55**  | 0.31 | 4.95  | 0.83**  | 0.29 | 2.86  |
| Insomnia                     |         |      |       |         |      |       | 2.66**  | 0.29 | 9.22  |
| R <sup>2</sup>               | 0.06    |      |       | 0.120** |      |       | 0.288** |      |       |
| R <sup>2</sup> Change        | 0.06    |      |       | 0.06**  |      |       | 0.168** |      |       |

\*P < 0.05

\*\* P < 0.001

SE: Standard Error; BMI: Body mass index; MSK: musculoskeletal

| Outcome: Anxiety Symptoms |         |      |       |         |      |       |          |      |       |
|---------------------------|---------|------|-------|---------|------|-------|----------|------|-------|
|                           | Model 1 |      |       | Model 2 |      |       | Model 3  |      |       |
| Variable                  | B       | SE   | T     | B       | SE   | T     | B        | SE   | T     |
| Constant                  | 2.052   | 1.41 | 1.46  | 2.318   | 1.35 | 1.72  | 1.547    | 1.23 | 1.26  |
| Age                       | -0.025* | 0.01 | -2.35 | -0.026* | 0.01 | -2.55 | -0.230** | 0.01 | -2.44 |
| Sex                       | 1.359*  | 0.43 | 3.15  | 1.021*  | 0.42 | 2.46  | 1.097*   | 0.38 | 2.89  |
| BMI                       | 0.089*  | 0.04 | 2.34  | 0.057   | 0.04 | 1.55  | 0.028    | 0.03 | 0.84  |
| MSK pain                  |         |      |       | 2.457** | 0.41 | 6.10  | 1.605**  | 0.39 | 4.17  |
| Insomnia                  |         |      |       |         |      |       | 3.254**  | 0.41 | 8.54  |
| R <sup>2</sup>            | 0.059   |      |       | 0.147** |      |       | 0.291**  |      |       |
| R <sup>2</sup> Change     | 0.059   |      |       | 0.088** |      |       | 0.144**  |      |       |

\*P <0.05

\*\* P < 0.001

SE: Standard Error; BMI: Body mass index; MSK: musculoskeletal
